# Supplementary material for: The Jacob2 Lectin of the Entamoeba histolytica Cyst Wall Binds Chitin and Is Polymorphic
Source: PLoS Negl Trop Dis. 2010 Jul 20;4(7):e750. doi: 10.1371/journal.pntd.0000750 (PMC2907411; doi:10.1371/journal.pntd.0000750)
Supplement: Table S1 — Entamoeba proteins with chitin-binding domains (CBDs). (0.05 MB DOC) [file pntd.0000750.s002.doc]

Table S1. *Entamoeba* proteins with chitin-binding domains (CBDs).

Protein AmoebaDB length 6-cys 8-Cys other features Experiments

EhJacob1 [EHI_028930](http://amoebadb.org/amoeba/showRecord.do?name=GeneRecordClasses.GeneRecordClass&project_id=AmoebaDB&primary_key=EHI_028930)1 151-aa 2 0 [10,here]

EdJacob1 [EDI_136500](http://amoebadb.org/amoeba/showRecord.do?name=GeneRecordClasses.GeneRecordClass&project_id=AmoebaDB&primary_key=EDI_136500) (85%)

EhJacob2 [EHI_044500](http://amoebadb.org/amoeba/showRecord.do?name=GeneRecordClasses.GeneRecordClass&project_id=AmoebaDB&primary_key=EHI_044500) 574-aa 3 0 very large spacer here

EdJacob2 [EDI_246160](http://amoebadb.org/amoeba/showRecord.do?name=GeneRecordClasses.GeneRecordClass&project_id=AmoebaDB&primary_key=EDI_246160) (92%)2

EiJacob13 [EIN_050710](http://amoebadb.org/amoeba/showRecord.do?name=GeneRecordClasses.GeneRecordClass&project_id=AmoebaDB&primary_key=EIN_050710) 401-aa 5 0 [6,7]

EiJacob2 [EIN_137570](http://amoebadb.org/amoeba/showRecord.do?name=GeneRecordClasses.GeneRecordClass&project_id=AmoebaDB&primary_key=EIN_137570) 419-aa 5 0 [7]

EiJacob3 [EIN_016240](http://amoebadb.org/amoeba/showRecord.do?name=GeneRecordClasses.GeneRecordClass&project_id=AmoebaDB&primary_key=EIN_016240) 351-aa 5 0 [7]

EiJacob4 EIN_294450 AmoebaDB EIN_294450 399-aa 5 0 [7]

EiJacob5 [EIN_104770](http://amoebadb.org/amoeba/showRecord.do?name=GeneRecordClasses.GeneRecordClass&project_id=AmoebaDB&primary_key=EIN_104770) 204-aa 3 0 [7]

EiJacob6 [EIN_015880](http://amoebadb.org/amoeba/showRecord.do?name=GeneRecordClasses.GeneRecordClass&project_id=AmoebaDB&primary_key=EIN_015880) 1021-aa 6 0 very large spacer [7]

EiJacob7 [EIN_186850](http://amoebadb.org/amoeba/showRecord.do?name=GeneRecordClasses.GeneRecordClass&project_id=AmoebaDB&primary_key=EIN_186850) 681-aa 3 0 very large spacer [7]

Ehchitinase1 [EHI_109890](http://amoebadb.org/amoeba/showRecord.do?name=GeneRecordClasses.GeneRecordClass&project_id=AmoebaDB&primary_key=EHI_109890) 507-aa 0 1 catalytic domain [8,10,here]

Edchitinase1 [EDI_120190](http://amoebadb.org/amoeba/showRecord.do?name=GeneRecordClasses.GeneRecordClass&project_id=AmoebaDB&primary_key=EDI_120190) (95%)4

Eichitinase1 [EIN_084170](http://amoebadb.org/amoeba/showRecord.do?name=GeneRecordClasses.GeneRecordClass&project_id=AmoebaDB&primary_key=EIN_084170)

Eichitinase [EIN_289570](http://amoebadb.org/amoeba/showRecord.do?name=GeneRecordClasses.GeneRecordClass&project_id=AmoebaDB&primary_key=EIN_289570)

Eichitinase EIN_239240

Eichitinase [EIN_059870](http://amoebadb.org/amoeba/showRecord.do?name=GeneRecordClasses.GeneRecordClass&project_id=AmoebaDB&primary_key=EIN_059870) 381-aa 0 0 catalytic domain [9]

Eichitinase [EIN_053310](http://amoebadb.org/amoeba/showRecord.do?name=GeneRecordClasses.GeneRecordClass&project_id=AmoebaDB&primary_key=EIN_053310)

EhJessie3 [EHI_152170](http://amoebadb.org/amoeba/showRecord.do?name=GeneRecordClasses.GeneRecordClass&source_id=EHI_152170&project_id=AmoebaDB) 621-aa 0 1 daub domain [10,11,here]

EdJessie3 [EDI_038370](http://amoebadb.org/amoeba/showRecord.do?name=GeneRecordClasses.GeneRecordClass&project_id=AmoebaDB&primary_key=EDI_038370) (96%)

EiJessie3 [EIN_040990](http://amoebadb.org/amoeba/showRecord.do?name=GeneRecordClasses.GeneRecordClass&project_id=AmoebaDB&primary_key=EIN_040990) [7,10,11]

EiJessie3 [EIN_058620](http://amoebadb.org/amoeba/showRecord.do?name=GeneRecordClasses.GeneRecordClass&project_id=AmoebaDB&primary_key=EIN_058620)

EhJessie1 [EHI_024660](http://amoebadb.org/amoeba/showRecord.do?name=GeneRecordClasses.GeneRecordClass&project_id=AmoebaDB&primary_key=EHI_024660) 90-aa 0 1 [10]

EdJessie15 predicted (97%)

EhJessie2 [EHI_092100](http://amoebadb.org/amoeba/showRecord.do?name=GeneRecordClasses.GeneRecordClass&project_id=AmoebaDB&primary_key=EHI_092100) [10]

EdJessie25 predicted (84%)

EhJessie4 [EHI_180790](http://amoebadb.org/amoeba/showRecord.do?name=GeneRecordClasses.GeneRecordClass&project_id=AmoebaDB&primary_key=EHI_180790)

EdJessie45 predicted (93%)

EiJessie1 EIN_059900

EiJessie1 EIN_312260

EiJessie1 EIN_243430

1EhJacob1 is present in three nearly identical copies: [EHI_028930](http://amoebadb.org/amoeba/showRecord.do?name=GeneRecordClasses.GeneRecordClass&project_id=AmoebaDB&primary_key=EHI_028930), EHI_067190, and EHI_136360.

2Identities are shown for chitin-binding domains but do not include Ser-rich spacer that is not alignable between EhJacob2 and EdJacob2. For differences in these regions see Fig. S1.

3EiJacob1 is present in two nearly identical copies: [EIN_050710](http://amoebadb.org/amoeba/showRecord.do?name=GeneRecordClasses.GeneRecordClass&project_id=AmoebaDB&primary_key=EIN_050710) and [EIN_051170](http://amoebadb.org/amoeba/showRecord.do?name=GeneRecordClasses.GeneRecordClass&project_id=AmoebaDB&primary_key=EIN_051170).

4Identities are shown for chitin-binding domains and catalytic domains but do not include Ser-rich spacer that is not alignable between Ehchitinase1 and Edchitinase1. See Refs [16,17] for characterization of these spacers.

5EdJessie1, EdJessie2, and EdJessie4 were each identified by TBLASTN of Ed genomic sequences. Why these proteins were absent from the set of Ed genes is not clear.
